# Supplementary material for: Translational status of biomedical Mg devices in China
Source: PubMed Central journal article supplement — Bioact Mater. 2019 Nov 15;4:358–65. doi: 10.1016/j.bioactmat.2019.11.001 (PMC6939060; doi:10.1016/j.bioactmat.2019.11.001), 2019-11-15
Supplement: mmc4.pdf [file mmc4.pdf]

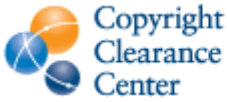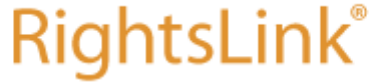

Home

Account Info

Help

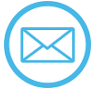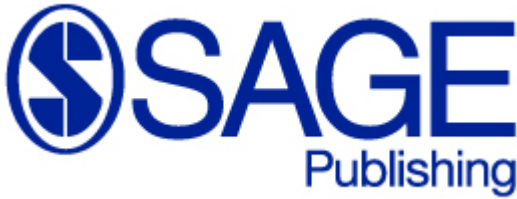

**Title:** In vivo and in vitro assessment of the biocompatibility and degradation of high-purity Mg anastomotic staples

**Author:** Su Qu, Jiazeng Xia, Jun Yan, et al

**Publication:** Journal of Biomaterials Applications

**Publisher:** SAGE Publications

**Date:** 03/01/2017

Copyright © 2017, © SAGE Publications

Logged in as:  
 Xiaonong Zhang  
 Shanghai  
 Jiaotong  
 University  
 Account #:  
 3001538898

LOGOUT

### Gratis Reuse

If you are a SAGE journal author requesting permission to reuse material from your journal article, please note you may be able to reuse your content without requiring permission from SAGE. Please review SAGE's author reuse and archiving policies at <https://us.sagepub.com/en-us/nam/journal-author-archiving-policies-and-re-use> for more information.

If your request does not fall within SAGE's reuse guidelines, please proceed with submitting your request by selecting one of the other reuse categories that describes your use. Please note, a fee may be charged for reuse of content requiring permission. Please contact [permissions@sagepub.co.uk](mailto:permissions@sagepub.co.uk) if you have questions.

BACK

CLOSE WINDOW

Copyright © 2019 [Copyright Clearance Center, Inc.](#) All Rights Reserved. [Privacy statement.](#) [Terms and Conditions.](#)

Comments? We would like to hear from you. E-mail us at [customercare@copyright.com](mailto:customercare@copyright.com)
